# Supplementary material for: Traditional Chinese Medicine in the treatment of hemorrhoids—a review of preparations used and their mechanism of action
Source: Front Pharmacol. 2023 Oct 19;14:1270339. doi: 10.3389/fphar.2023.1270339 (PMC10620711; doi:10.3389/fphar.2023.1270339)
Supplement: Supplementary file 1 [file Table1.xlsx]

## Sheet: Sheet1
Table S1 List of TCM formulas with antihemorrhoid effect
Aspect	TCM formulas	Composition	Extraction	Optimal dose	Duration	Positive control	Model	Mechanisms	Ref
Anal Cushion Tissue	Buzhong Yiqi granules	Astragalus membranaceus (Fisch.) Bunge [Fabaceae; Astragali Radix], Panax ginseng C. A. Mey. [Araliaceae; Ginseng Radix Et Rhizoma], Angelica sinensis (Oliv.) Diels [Apiaceae; Angelicae Sinensis Radix], Citrus reticulata Blanco [Rutaceae; Citri Reticulatae Pericarpium], Cimicifuga foetida Linn [Ranunculaceae; Cimicifugae Rhizoma], Bupleurum chinensis DC [Apiaceae; Radix Bupleuri], Atractylodes ma…	Mix in a ratio of 20: 9: 12: 9: 15: 6: 12: 6 g in sequence	10 g/d	Twice daily for 4 weeks	Melilotus Extract Tablets	Human	fibulin-3­, fibulin-5­, MMP-9¯	Sun (2014)
			The eight botanical drugs mentioned above underwent a two-step decoction process, utilizing 6.4 times and 3.2 times the volume of water, respectively. Both rounds of decoction lasted for half an hour. The resulting decoctions were then filtered, dried at 80℃ for 2 hours, crushed, passed through an 80-mesh sieve, and mixed with 10% corn starch.
	Bu Zhong Yi Qi Decoction	Same as ‘Buzhong Yiqi granules’ above	Mix in a ratio of 20:9:12:9:15:6:12:6 g in sequence	89 g/d	100 ml 3 times a day for 1 week	Melilotus Extract Tablets	Human	fibulin-5­	Xiao (2016) Sun et al. (2018)
			Extraction process not provided
	Buzhong Yiqi Decoction Containing Different Doses of Radix Astragali	Same as ‘Buzhong Yiqi granules’ above	Group1 Mix in a ratio of 20:9:12:9:15:6:12:6 g in sequence Group2 Mix in a ratio of 50:9:12:9:15:6:12:6 g in sequence	Group1: 89 g/d Group2: 119 g/d	Twice daily for 2 weeks	None	Human	fibulin-3­	Jin et al. (2017) Zhong (2016)
			Extraction process not provided
	Modified Buzhong Yiqi Decoction	Astragalus membranaceus (Fisch.) Bunge [Fabaceae; Astragali Radix], Panax ginseng C. A. Mey. [Araliaceae; Ginseng Radix Et Rhizoma], Angelica sinensis (Oliv.) Diels [Apiaceae; Angelicae Sinensis Radix], Citrus reticulata Blanco [Rutaceae; Citri Reticulatae Pericarpium], Cimicifuga foetida Linn [Ranunculaceae; Cimicifugae Rhizoma], Bupleurum chinensis DC [Apiaceae; Radix Bupleuri], Atractylodes ma…	Mix in a ratio of 18:10:14:8:6:8:10:8:8:10:14:14:10g in sequence	3.25 g/d	2 weeks of treatment	None	Rat (induced by acetic acid)	fibulin-5­	Jiang and Liang (2018)
			Extraction process not provided	0.1 g/ml
	Shiquan Yuzhen Decoction	Codonopsis pilosula (Franch.) Nannf [Campanulaceae; Radix Codonopsis], Astragalus membranaceus (Fisch.) Bunge [Fabaceae; Astragali Radix], Dioscorea opposita Thunb [Dioscoreaceae; Rhizoma Dioscoreae], Anemarrhena asphodeloides Bge [Asparagaceae; Rhizoma Anemarrhenae], Scrophularia ningpoensis Hemsl [Scrophulariaceae; Scrophulariae Radix], Os Draconis, Ostrea gigas Thunberg [Ostreidae; Concha Ostr…	Mix in a ratio of 12:12:12:12:12:12:12:6::10:5g in sequence	110 g/d	100ml each time, twice a day	None	Human	MMP-7¯, MMP-9¯	Dai (2020)
			The above traditional Chinese medicines are decocted to 200ml	0.55 g/ml
	TCM hot and humid dressing	Rhus chinensis Mill [Anacardiaceae; Galla Chinensis], Rheum palmatum L [Polygonaceae; Rhei Radix Et Rhizoma], Polygonum cuspidatum Sieb. et Zucc [Polygonaceae; Polygoni Cuspidati Rhizoma et Radix], Phellodendron chinense Schneid [Rutaceae; Phellodendri Chinensis Cortex]	Mix in a ratio of 20:30:30:20g in sequence	100 g/d	150 ml twice a day for 2 weeks.	ZhiJiXiYe	Human	MMP-9¯	Guo et al. (2017)
			The above traditional Chinese medicines are decocted to 150ml	0.33 g/ml
	Zhixuening Mixture	Sophora japonica L [Fabaceae; Sophorae Fructus]， Sanguisorba officinalis L [Rosaceae; Sanguisorbae Radix], Platycladus orientalis (L.) Franco [Cupressaceae; Platycladi Cacumen], Scutellaria baicalensis Georgi [Lamiaceae; Scutellariae Radix], Phellodendron chinense Schneid [Rutaceae; Phellodendri Chinensis Cortex], Agrimonia pilosa Ledeb [Rosaceae; Agrimoniae Herba], Rehmannia glutinosa Libosch [O…	Mix in a ratio of 15:15:15:10:10:15:15:15:20:15:9:30:15g in sequence	199 g/d	20 ml 3 times a day for 1 week	None	Human	MMP-9¯	Zhang et al. (2013)
			Extraction process not provided	3.31 g/ml
	Yin Zhi Anorectal Smoked Lotion	Lonicera japonica Thunb [Caprifoliaceae; Lonicerae Japonicae Flos], Angelica dahurica (Fisch. ex Hoffm) Benth. et Hook.f [Apiaceae; Angelicae Dahuricae Radix], Tripterygium hypoglaucum (Levl.) Hutch [Celastraceae; Tripterygii Hypoglauci Radix et Rhizoma], Rheum palmatum L [Polygonaceae; Rhei Radix Et Rhizoma], Schizonepeta tenuifolia Briq [Lamiaceae; Schizonepetae Herba], Artemisia argyi Levl. et…	Drug proportion and extraction process not provided	60 g/each time	Twice daily for 1 week	JinXuanZhiKeXunXiSan(MaYingLong)	Human	MMP-9¯	Yang et al. (2015)
Varicose Veins	Xileisan temperature-sensitive gels	Polygonum tinctorium Ait [Polygonaceae; Indigo Naturalis], Pteria martensii (Dunker) [Margaritiferidae; Margaritifera], Elephas maximus L. or Elephas africanns capensis [Elephantidae; Elephant tusk], Uroctea compactilis (L. Koch) [Theridiidae; Spider], Bos taurus domesticus Gmelin [Bovidae; Bovis Calculus], Nail, Borneolum Syntheticum	Xileisan proportion and extraction process not provided	0.5 ml/d	Once a day for 1 week	None	Rat (induced by COP)	eNOS¯	Jia et al. (2023)
			Take 1 mL of blank temperature-sensitive gels and add 0.2 g of Xileisan Mix well to obtain Xileisan temperature-sensitive gels
	Sihuang Hemorrhoids Ointment	Scutellaria baicalensis Georgi [Lamiaceae; Scutellariae Radix], Coptis chinensis Franch [Ranunculaceae; Coptidis Rhizoma], Phellodendron chinense Schneid [Rutaceae; Phellodendri Chinensis Cortex], Rheum palmatum L [Polygonaceae; Rhei Radix Et Rhizoma], Panax notoginseng (Burk.) F.H.Chen [Araliaceae; Notoginseng Radix Et Rhizoma], Senecio scandens Buch.-Ham [Asteraceae; Climbing Groundsel Herb], B…	Drug proportion and extraction process not provided	1 g/kg	Twice daily for 1 week	Ma Ying Long Hemorrhoids Ointment	Rat (induced by acetic acid)	iNOS¯	Zhang (2015)
	Modified Huanglian Jiedu Decoction	Coptis chinensis Franch [Ranunculaceae; Coptidis Rhizoma], Phellodendron chinense Schneid [Rutaceae; Phellodendri Chinensis Cortex], Gardenia jasminoides Ellis [Rubiaceae; Fructus Gardeniae], Scutellaria baicalensis Georgi [Lamiaceae; Scutellariae Radix], Pulsatilla chinensis (Bge.) Regel [Ranunculaceae; Pulsatillae Radix], Fraxinus szaboana Lingelsh [Oleaceae; Fraxini Cortex], Rheum palmatum L […	Mix in a ratio of 10:30:20:15:15:10:20 g in sequence	Group1: 10.5 g/d Group2: 5.25 g/d	Twice daily for 1 week	Ma Ying Long Hemorrhoids Ointment	Rat (induced by acetic acid)	iNOS¯	Zhang (2017)
			Extraction process not provided	Group1: 0.10 g/ml Group2: 0.05 g/ml
	Zingiberis Rhizoma Recens	Zingiber officinale Rosc. [Zingiberaceae; Zingiberis Rhizoma Recens]	Fresh rhizomes of Zingiber officinale (directly pulverized)	Group1: 10 g/d	Once a day for 6 h for 11 d	MaYingLong SheXiangZhiChuang Gao	Rat and mouse (induced by acetic acid)	NO¯	Lou et al.(2019)
				Group2 :5 g/d
Angiogenesis	TCM hot and humid dressing	Same as ‘TCM hot and humid dressing’ above						VEGF¯	Guo et al. (2017)
	Zhixuening Mixture	Same as ‘Zhixuening Mixture’ above					Human Human Umbilical Vein Endothelial Cells	VEGF¯， Xpo1/p53/p66Shc/p16 signaling pathway¯	Wang (2019) Zhang et al. (2013)
	Yin Zhi Anorectal Smoked Lotion	Same as ‘Yin Zhi Anorectal Smoked Lotion’ above		60 g/each time	Twice daily for 1 week	JinXuanZhiKeXunXiSan (MaYingLong)	Human	VEGF¯	Yang et al. (2015)
	Yinzhi Granule			None	None		Rat and mouse	VEGF¯	Ma et al. (2018)
	Bean Paste Herb Tea	Sophora tonkinensis Gapnep [Fabaceae; Radix Sophorae Tonkinensis], Calvatia lilacina (Mont. et Berk.) Lloyd [Lycoperdaceae; Lasiosphaera Calvatia], Forsythia suspensa (Thunb.) Vahl [Oleaceae; Forsythiae Fructus], Arctium lappa L [Asteraceae; Fructus arctii], Sophora japonica L [Fabaceae; Sophorae Flos], Sanguisorba officinalis L [Rosaceae; Sanguisorbae Radix], Phellodendron chinense Schneid [Ruta…	Mix in a ratio of 10:10:15:15:30:30:10:15:30:10:6g in sequence	181 g/d	One sachet three times a day for 1 week	DiYuHuaiJiaoWan (TongRenTang)	Human	VEGF¯	Li (2017)
			The eleven traditional Chinese medicine on the left are decocted using an automatic decoction machine and divided into 3 sachets.
	Bu Zhong Yi Qi Decoction	Same as ‘Buzhong Yiqi Decoction’ above			One dose once a day for 2 weeks	None	Human	Akt phosphorylation¯, VEGFR2¯	Bai (2018)
	Sanhuang Zhixue Capsule	Panax notoginseng (Burk.) F.H. Chen [Araliaceae; Notoginseng Radix Et Rhizoma], Typha angustifolia L [Typhaceae; Cattail Pollen], Equus asinus L [Equidae; Asini Corii Colla]	Drug proportion and extraction process not provided	156 mg/kg	Three times a day for two days	LongXueJiePian	Rat	VEGF¯	Zhao (2013)
	Sihuang Hemorrhoids Ointment	Same as ‘Sihuang Hemorrhoids Ointment’ above						VEGF¯	Zhang (2015)
	Xileisan temperature-sensitive gels	Same as ‘Xileisan temperature-sensitive gels’ above						VEGF-A¯	Jia et al. (2023)
	Modified Huanglian Jiedu Decoction	Same as ‘Modified Huanglian Jiedu Decoction’ above						VEGF¯	Zhang (2017)
Inflammatory Factor	Yin Zhi Anorectal Smoked Lotion	Same as ‘Yin Zhi Anorectal Smoked Lotion’ above		60 g/each time	Twice daily for 1 week	JinXuanZhiKeXunXiSan(MaYingLong)	Human	CD68¯	Yang et al. (2015)
	Yinzhi Granule			None	None		Rat (induced by acetic acid)	CD68¯	Ma et al. (2018)
	Sihuang Hemorrhoids Ointment	Same as ‘Sihuang Hemorrhoids Ointment’ above						CD68¯	Zhang (2015)
	TCM internal and external treatment	Taraxacum mongolicum Hand. - Mazz [Asteraceae; Herba Taraxaci], Sargentodoxa cuneata (Oliv.) Rehd. et Wils [Lamiaceae; Sargentodoxae Caulis], Prunus mume Sieb. et Zucc [Rosaceae; Fructus Mume], Phellodendron chinense Schneid [Rutaceae; Phellodendri Chinensis Cortex], Sophora flavescens Ait [Fabaceae; Sophorae Flavescentis Radix], Cnidium monnieri (L.) Cuss [Apiaceae; Cnidii Fructus], Rhus chinens…	Mix in a ratio of 30:30:30:27:27:18:12:10g in sequence	184 g/d	Twice a day	Potassium Permanganate solution	Human	IL-17¯, IL-6¯, TNF-α¯	Yang et al. (2018)
			Extraction process not provided
	Lian-Zhi-San	Phellodendron chinense Schneid [Rutaceae; Phellodendri Chinensis Cortex], Scutellaria baicalensis Georgi [Lamiaceae; Scutellariae Radix], Coptis chinensis Franch [Ranunculaceae; Coptidis Rhizoma], Rheum rhaponticum L [Polygonaceae; Rhei Radix Et Rhizoma], Daemonorops draco Bl [Arecaceae; Draconis Sanguis], Borneolum Syntheticum, Calamina	Mix in a ratio of 10:10:5:20:12.5:5:500g in sequence	100 mg/d	Twice a day for a week	None	Rat (induced by COP)	IL-1β¯, IL-6¯, TNF-α¯	Zhang et al. (2021)
			Firstly, Draconis Sanguis, Borneolum Syntheticum and Calamine were ground into powders and passed through a standard sieve (No. 7, 120 μm). Simultaneously, a mixture of Phellodendri Chinensis Cortex, Scutellariae Radix, Coptidis Rhizoma, and Rhei Radix et Rhizoma were extracted three times with 8 times the volume of water at 100°C for 30 minutes each time. Then, the resulting extract was concentr…
	Shaobei injection	Citric acid, Gallic acid, Paeoniflorin	Drug proportion and extraction process not provided	150 μl/each time	Once a week for a week	None	Rat (induced by COP)	TNF-α¯, IL-1¯, IL-6¯	Huang et al. (2020)
	Zingiberis Rhizoma Recens	Zingiber officinale Rosc. [Zingiberaceae; Zingiberis Rhizoma Recens]	Fresh rhizomes of Zingiber officinale (directly pulverized)	Group1: 10g/d	Once a day for 6 h for 11 d	MaYingLong SheXiangZhiChuangGao	Rat (induced by acetic acid)	IL-6¯, IL-1β¯, TNF-α¯	Lou et al. (2019)
				Group2: 5g/d
		Zingiber officinale Rosc. [Zingiberaceae; Ginger Essential Oil]	Drug proportion and extraction process not provided	Group1: 0.06 ml/each time	3 times a day, 10 min/each time, for a week		Mouse (induced by acetic acid)	IL-1β¯，TNF-α¯
				Group2: 0.03 ml/each time
	Modified Huanglian Jiedu Decoction	Same as ‘Modified Huanglian Jiedu Decoction’ above						PGE2¯	Zhang (2017)
Others	Zhixuening Mixture	Same as ‘Zhixuening Mixture’ above					Human Human Umbilical Vein Endothelial Cells	miR-375¯, miR-215-5p¯, miR-143-3p¯, miR-194-5p¯, miR-145-5p¯, miR-490-3p¯, miR-145-3p, miR-412-5p¯, miR-517b-3p­	Song (2019) Wang (2019)
	Jiuhuagao	Pulvis Talci, Borneolum Syntheticum, Cinnabaris, Os Draconis, Fritillaria thunbergii Mig [Liliaceae; Bulbus Fritillariae Thunbergii], Borax, Moschus berezovskii Flerov [Moschidae; Moschus]	Mix in a ratio of 15:6:3:15:9:9:1 g in sequence	One Jiuhuagao cotton ball (approx. 1cm x 1cm x 3cm) is used each time.	Twice daily for 1 week	None	Human	Enhancing the activity of fibroblasts, enhancing their synthetic secretory function	Zhang (2015)
			Talcum, Os Draconis, Bulb of Thunberg Fritillary and Borax were ground into powders and passed through a standard sieve (No. 7, 120 μm). Then, heat the sesame oil, add the aforementioned mixture, and stir until it cools to 60°C. Add Moschus, Borneolum Syntheticum, and Cinnabaris, and mix thoroughly, and then add Vaseline. Stir until creamy.
